# Supplementary material for: Establishment of tumor microenvironment-preserving organoid model from patients with intracranial meningioma
Source: PubMed Central journal article supplement (PMC10795458; doi:10.1186/s12935-024-03225-4), 2024-01-18
Supplement: 12935_2024_3225_MOESM1_ESM.pdf [file 12935_2024_3225_MOESM1_ESM.pdf]

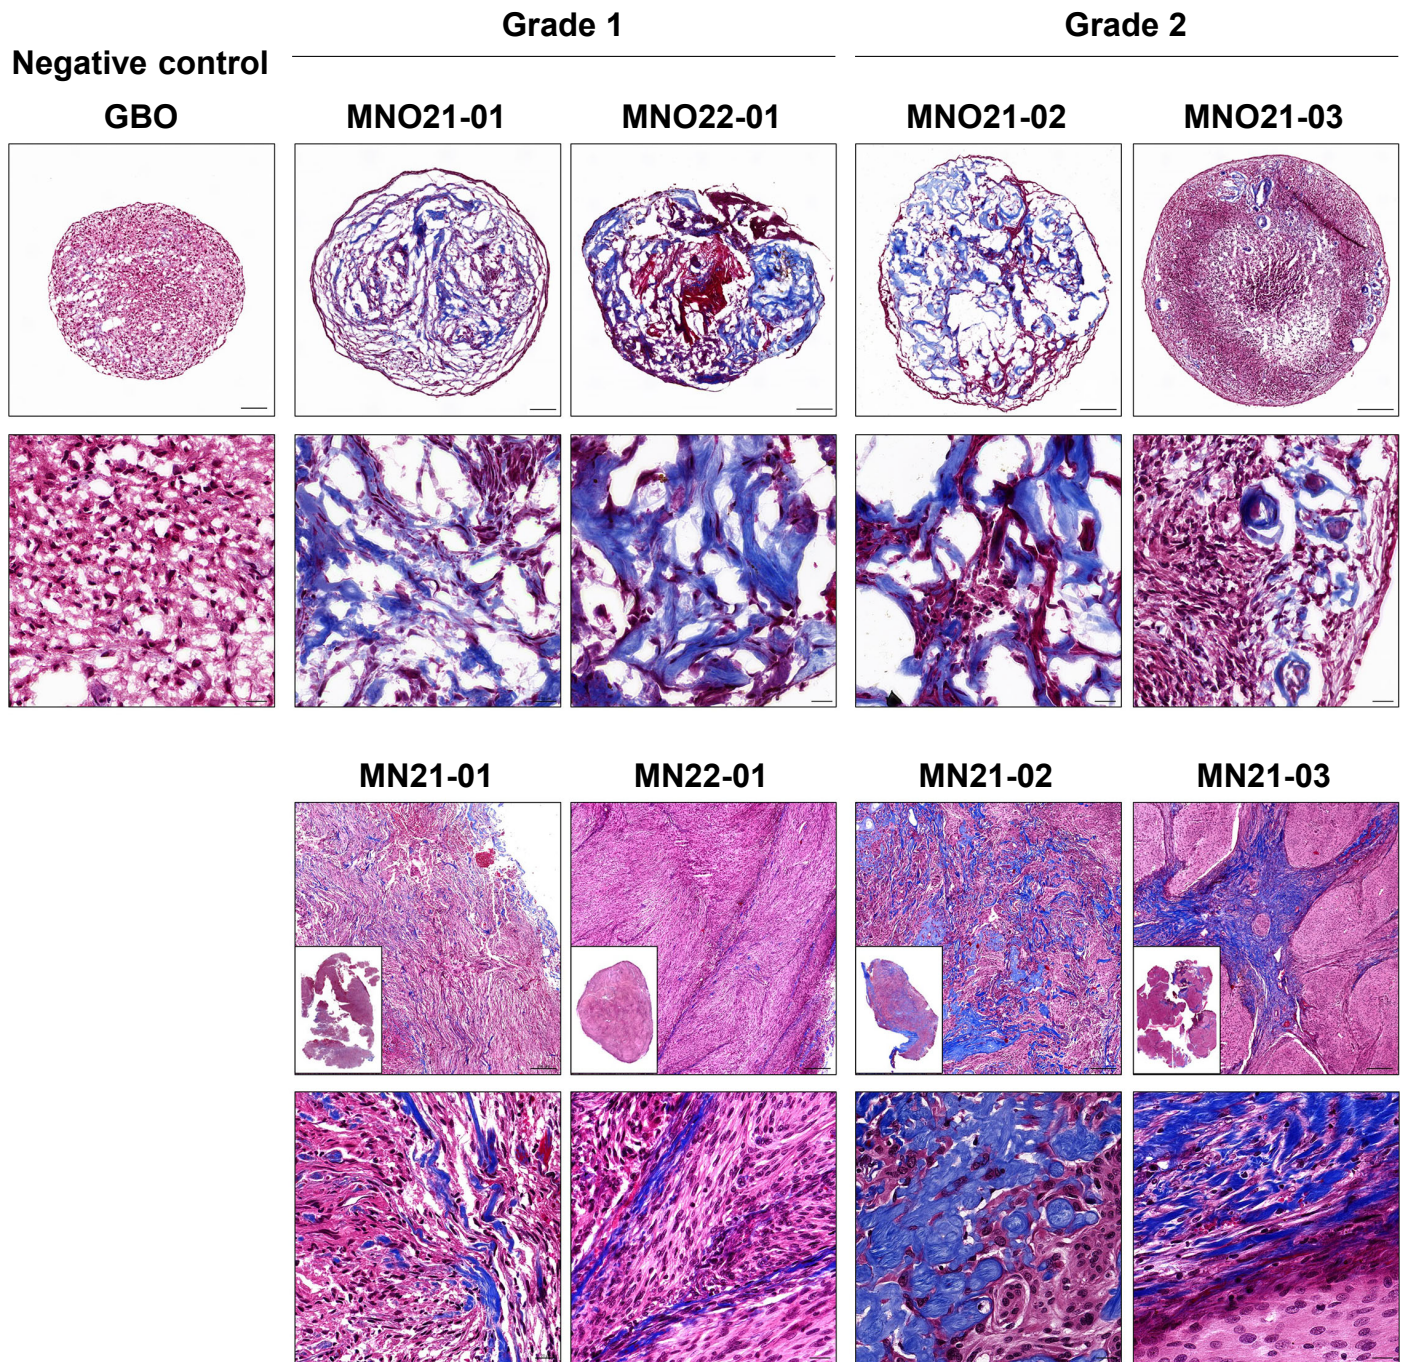

**Fig. S1 Masson's trichrome staining in MNOs and their parental tumors.** Collagen-rich tissue (blue) was observed using Masson's trichrome in MNOs (top) and their corresponding tumors (bottom). Blue = collagen fiber; red/pink = cytoplasm; dark red/purple = nuclei. Scale bars: upper images = 200  $\mu$ m; lower images = 20  $\mu$ m. Glioblastoma organoid (GBO) was used as a negative control.

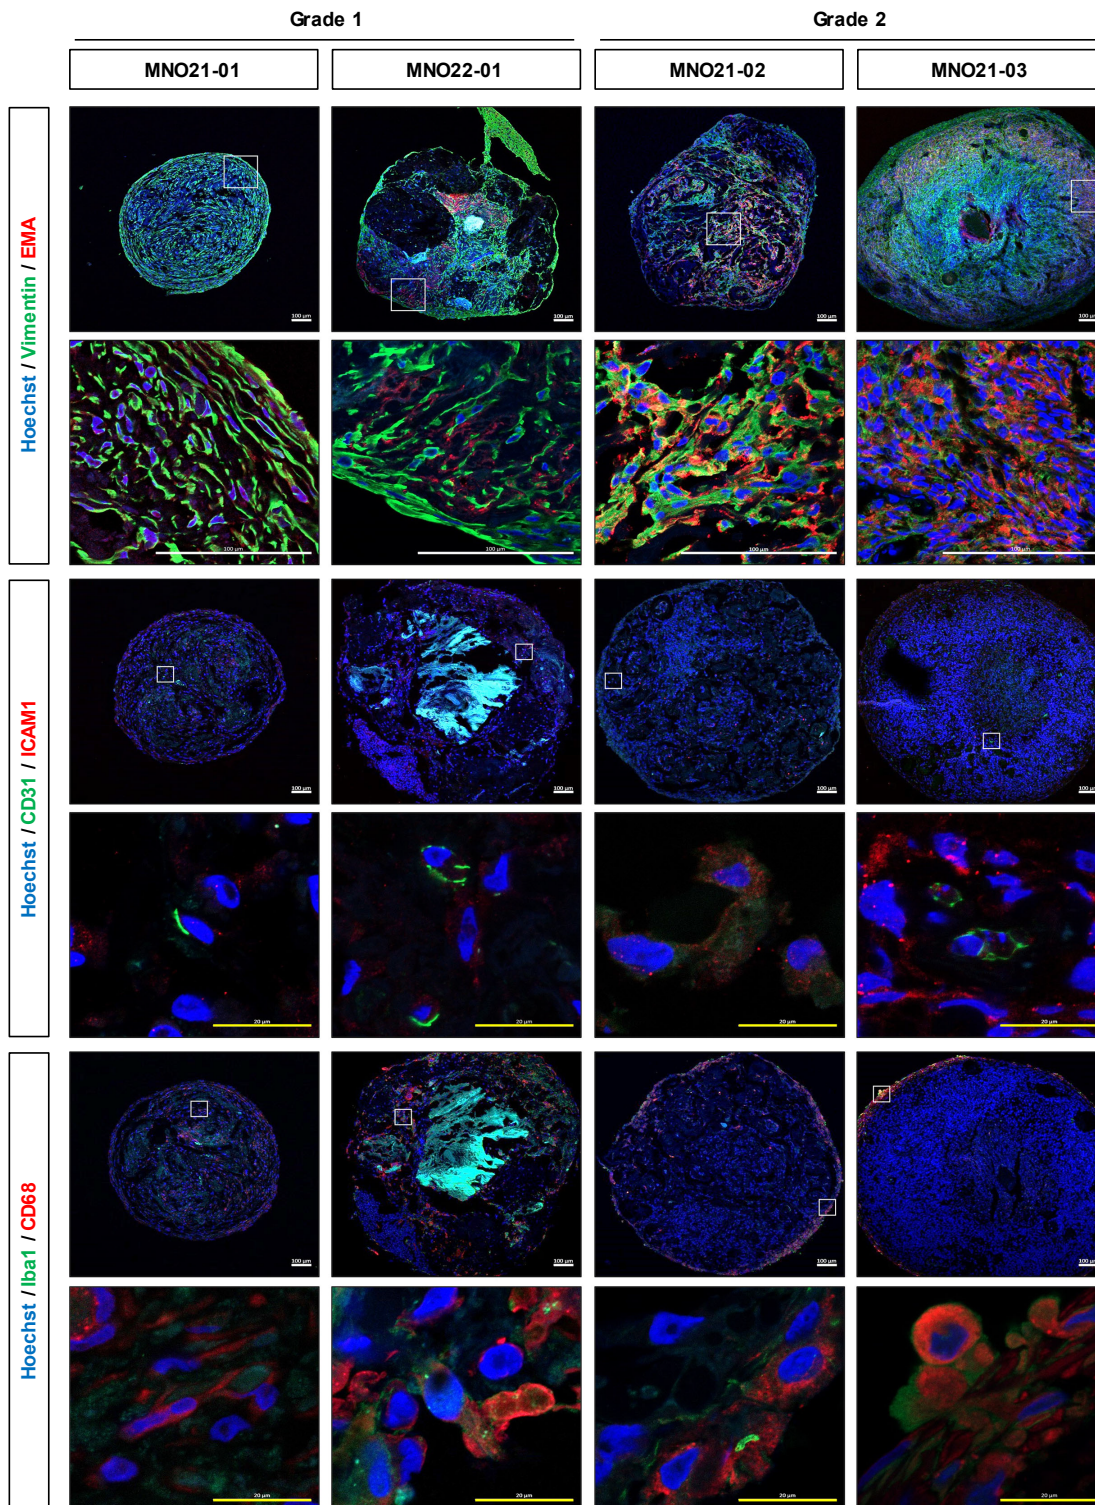

**Fig. S2 IF images of marker proteins in MNOs.** IF images using antibodies against EMA, Vimentin, CD31, ICAM1, CD68, and Iba1 in all MNOs. Lower panels show the enlarged areas marked by boxes in the upper panels. The nuclei were counterstained with Hoechst. White scale bars = 100 μm; yellow scale bars = 20 μm.

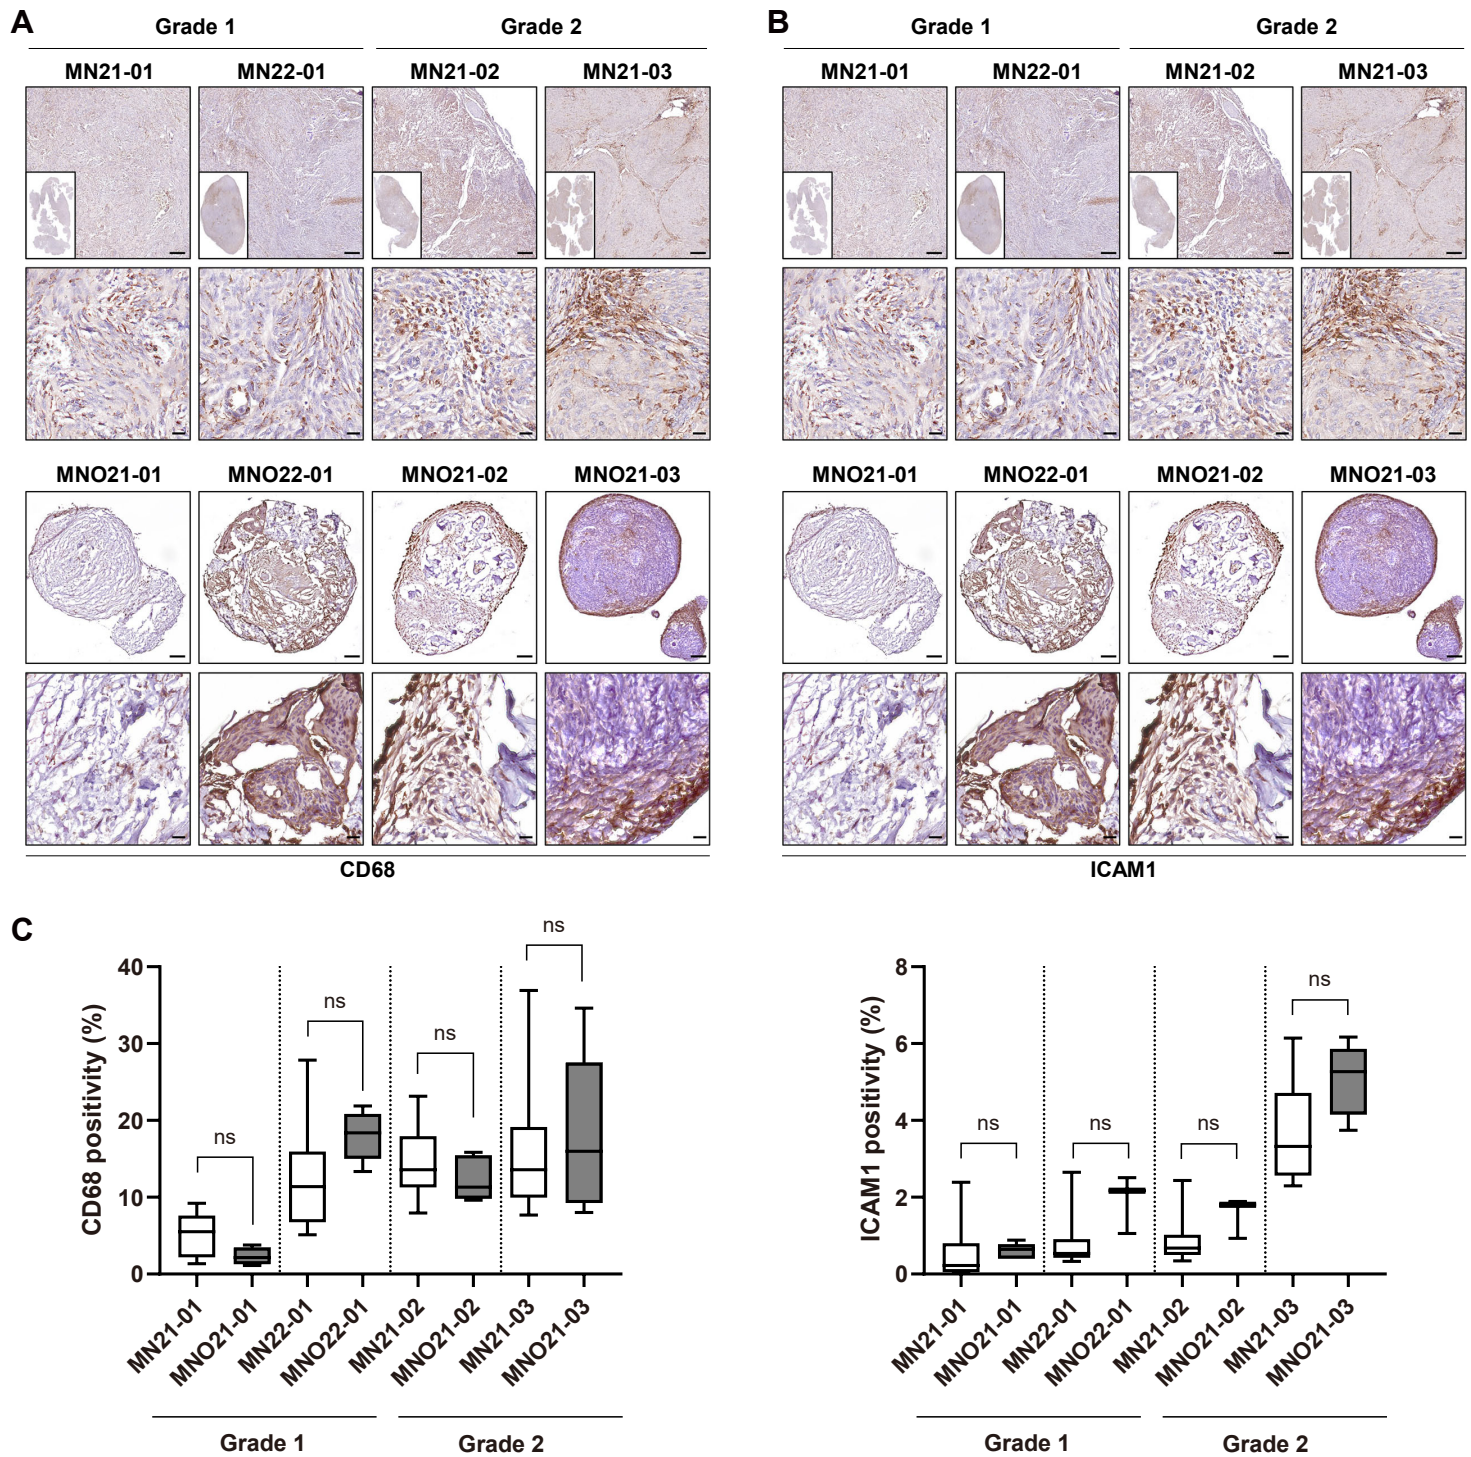

**Fig. S3 DAB staining images for CD68 and ICAM1 in MNOs and their parental tumors.** (A and B) DAB staining for CD68 (A) and ICAM1 (B) in MNOs (lower panel) and parental meningioma tissues (upper panel). Scale bars indicate 200  $\mu$ m (top) and 20  $\mu$ m (bottom, enlarged images). (C) Quantification of the expression levels of CD68 (left) and ICAM1 (right). Two-tailed Student's *t*-test was conducted to evaluate statistical significance.

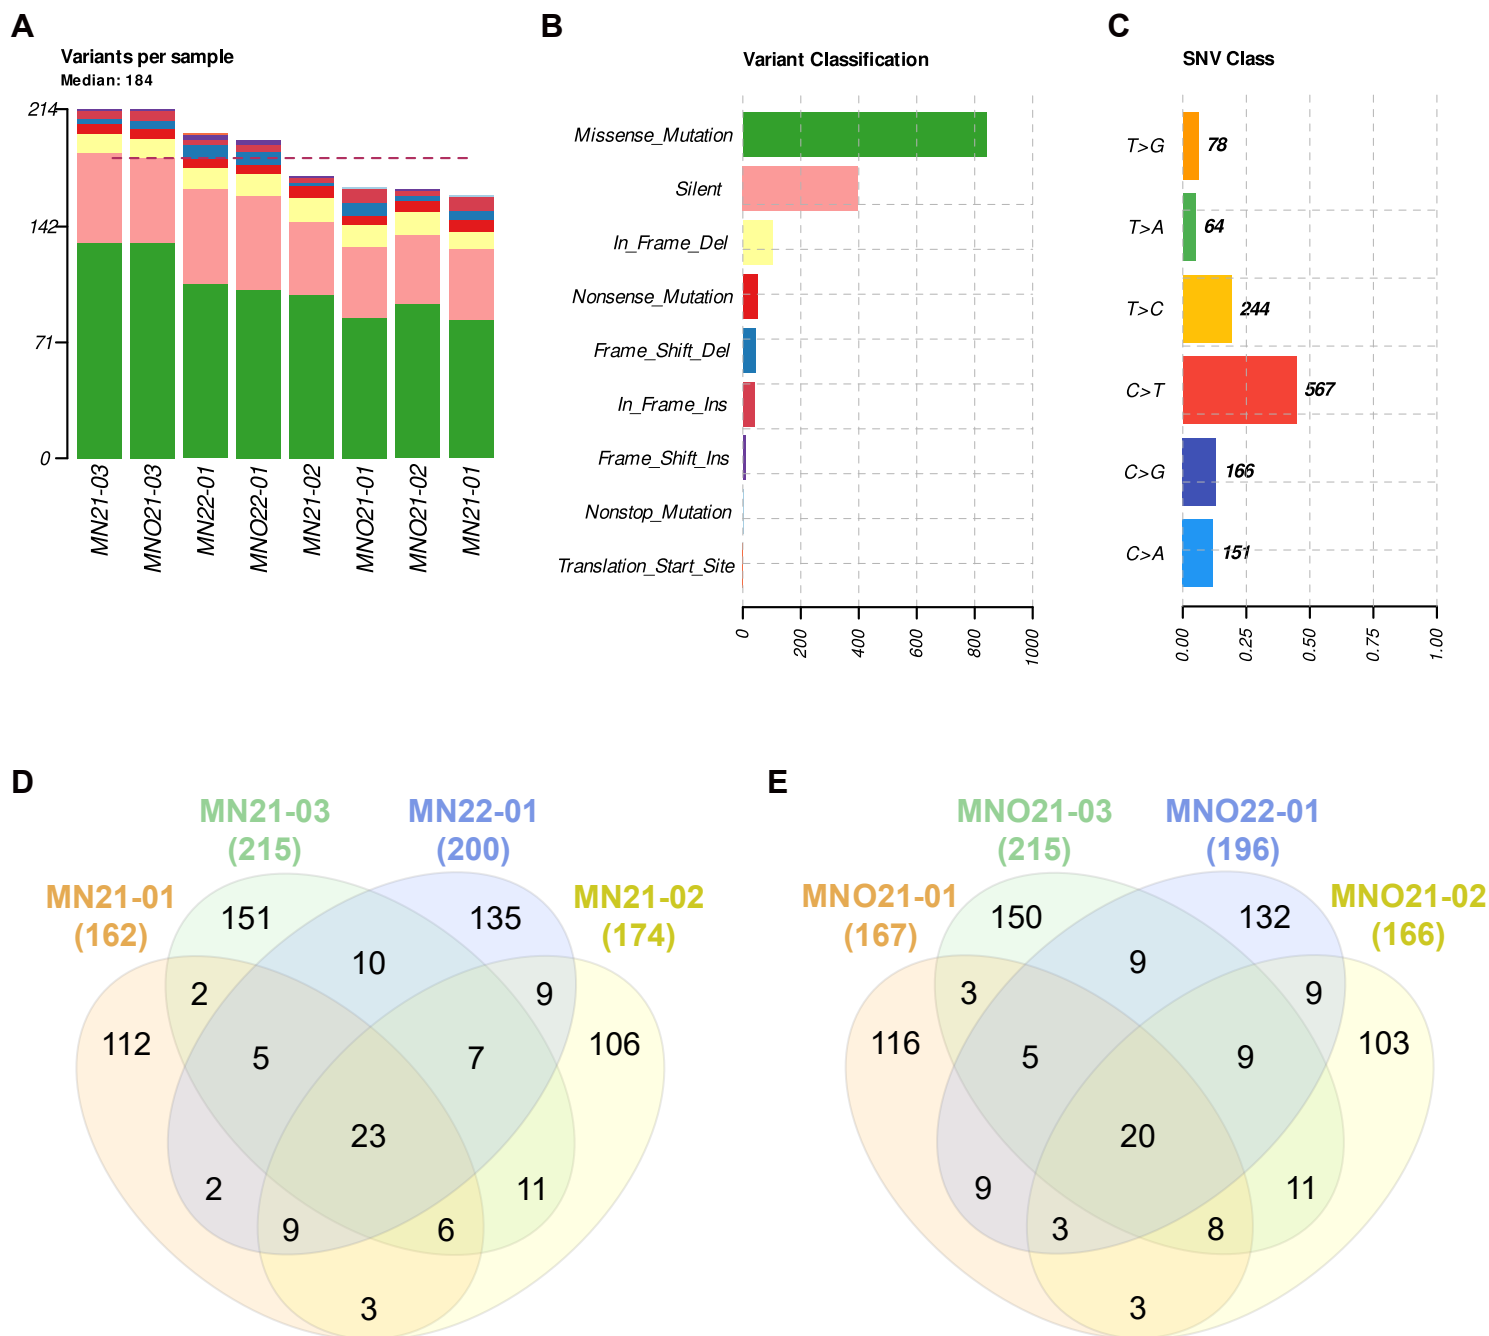

**Fig. S4 WES of MNOs and corresponding parental tumors.** (A and B) The number of variants and their types for each sample. (C) The number of each class of single nucleotide variants. (D and E) Venn diagram of the number of short variants (single nucleotide variants, insertions, and deletions) for parental tumors (D) and MNOs (E).

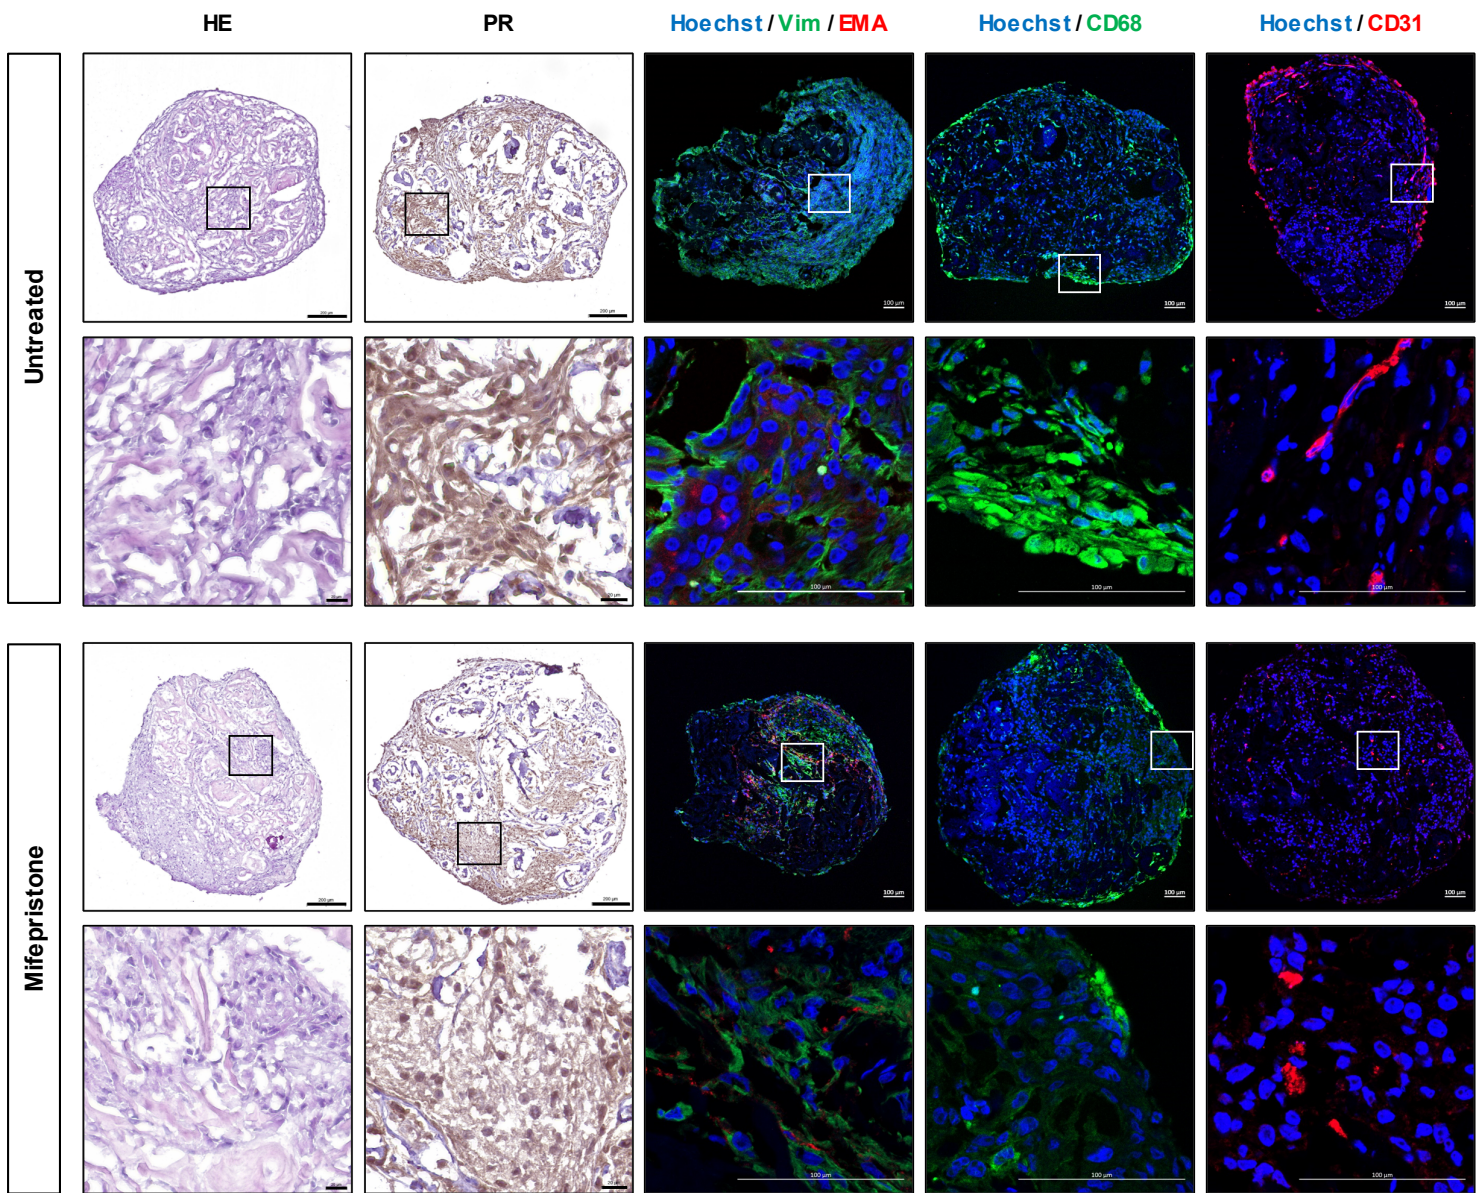

**Fig. S5 H&E and IHC images after treatment with mifepristone in MNO21-02.** H&E and immunostaining (PR, EMA, Vimentin, CD68, and CD31) images were captured after treatment with mifepristone for 72 h. Lower panels show the enlarged areas marked by boxes in the upper panels. The nuclei were counterstained with Hoechst in IF images. Scale bars indicate 200  $\mu\text{m}$  (top) and 20  $\mu\text{m}$  (bottom) in H&E and DAB staining images, and indicate 100  $\mu\text{m}$  (top and bottom) in IF images.

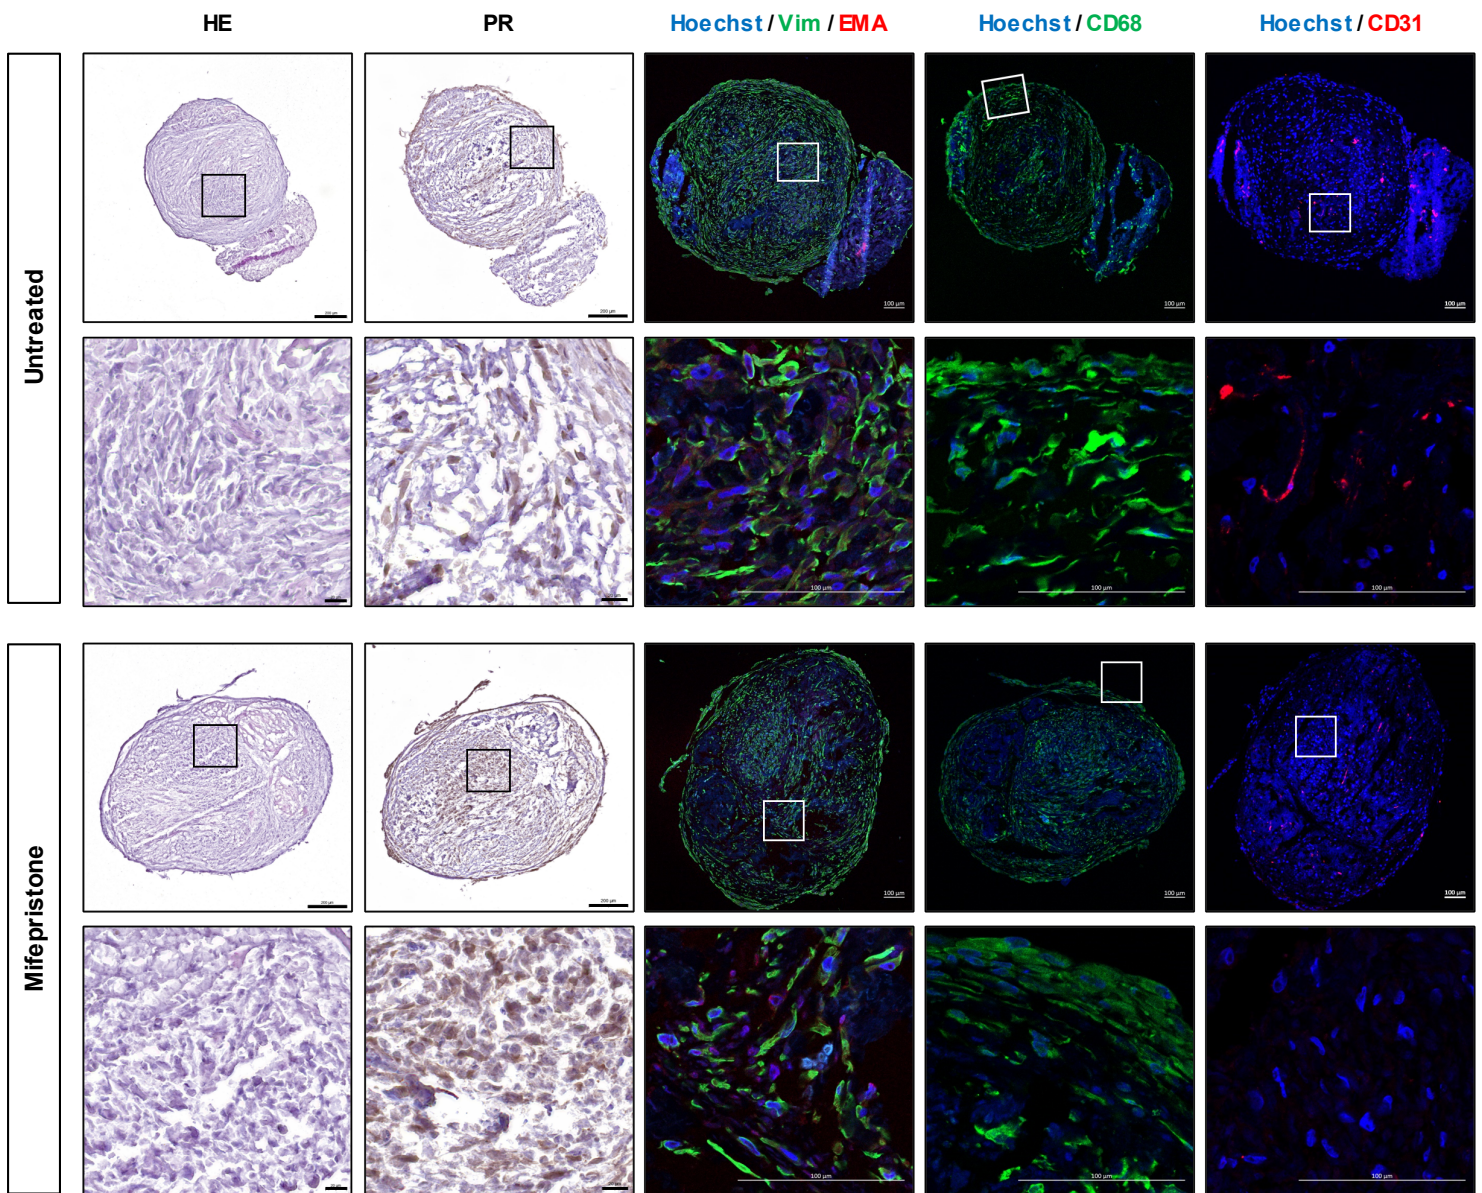

**Fig. S6 H&E and IHC images after treatment with mifepristone in MNO21-01.** H&E and immunostaining (PR, EMA, Vimentin, CD68, and CD31) images were captured after treatment with mifepristone for 72 h. Lower panels show the enlarged areas marked by boxes in the upper panels. The nuclei were counterstained with Hoechst in IF images. Scale bars indicate 200  $\mu\text{m}$  (top) and 20  $\mu\text{m}$  (bottom) in H&E and DAB staining images, and indicate 100  $\mu\text{m}$  (top and bottom) in IF images.

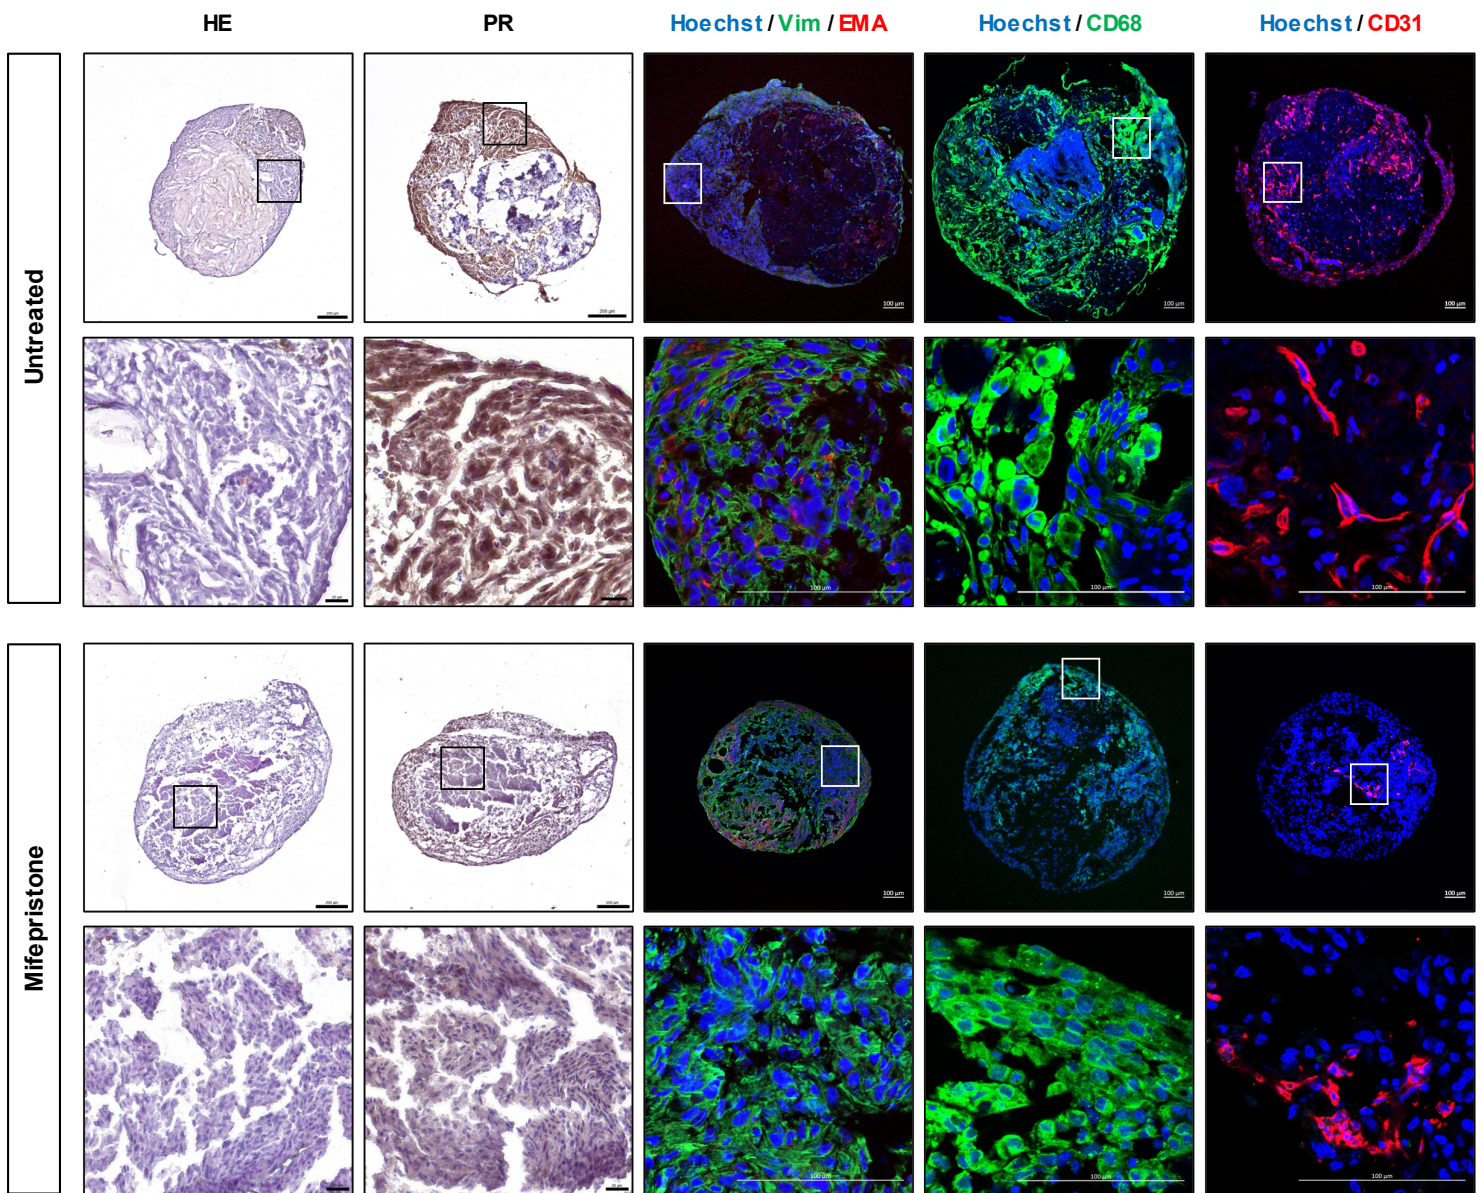

**Fig. S7 H&E and IHC images after treatment with mifepristone in MNO22-01.** H&E and immunostaining (PR, EMA, Vimentin, CD68, and CD31) images were captured after treatment with mifepristone for 72 h. Lower panels show the enlarged areas marked by boxes in the upper panels. The nuclei were counterstained with Hoechst in IF images. Scale bars indicate 200  $\mu\text{m}$  (top) and 20  $\mu\text{m}$  (bottom) in H&E and DAB staining images, and indicate 100  $\mu\text{m}$  (top and bottom) in IF images.

**Table S1 The information of antibodies used for immunostaining.**

| <b>Antibodies</b>                                       | <b>Dilution</b> | <b>Source</b>             | <b>Catalog</b> |
|---------------------------------------------------------|-----------------|---------------------------|----------------|
| Mouse monoclonal anti-Ki67                              | 1:500           | Abcam                     | ab245113       |
| Rabbit polyclonal anti-Ki67                             | 1:200           | Abcam                     | ab15580        |
| Rabbit monoclonal anti-Vimentin                         | 1:800           | Cell Signaling Technology | 5741           |
| Mouse monoclonal anti-CD31                              | 1:500           | Abcam                     | ab9498         |
| Rabbit monoclonal anti-CD3                              | 1:300           | Abcam                     | ab16669        |
| Mouse monoclonal anti-GFAP                              | 1:700           | Cell Signaling Technology | 3670           |
| Rabbit monoclonal anti-Olig2                            | 1:300           | Abcam                     | ab109186       |
| Rabbit polyclonal anti-SOX2                             | 1:1000          | Abcam                     | ab97959        |
| Mouse monoclonal anti-Epithelial Membrane Antigen (EMA) | 1:250           | Agilent Technologies      | M0613          |
| Mouse monoclonal anti-CD68                              | 1:100           | Abcam                     | ab955          |
| Mouse monoclonal Anti-pan Cytokeratin (panCK)           | 1:500           | Abcam                     | ab7753         |
| Rabbit monoclonal Anti-Iba1                             | 1:500           | Abcam                     | ab178846       |
| Mouse monoclonal anti-Progesterone receptor (PR)        | 1:500           | Santa Cruz Biotechnology  | sc-166169      |
| Dako REAL EnVision Detection System, Perox/DAB+, Rb/M   | N/A             | Agilent Technologies      | K500711-2      |
| Goat anti-rabbit IgG-FITC                               | 1:1000          | Santa Cruz Biotechnology  | sc-2012        |
| Goat anti-mouse IgG-CFL 647                             | 1:500           | Santa Cruz Biotechnology  | sc-362287      |
